# Supplementary material for: The Balance between Hydrogen Bonds, Halogen Bonds, and Chalcogen Bonds in the Crystal Structures of a Series of 1,3,4-Chalcogenadiazoles
Source: MDPI journal article supplement (doi:10.3390/molecules26144125), 2021-07-07
Supplement: s1 [file s1]

Supporting Information

# The balance between hydrogen bonds, halogen bonds, and chalcogen bonds in the crystal structures of a series of 1,3,4-chalcogenadizoles

Viraj De Silva<sup>1</sup>, Boris B. Averkiev<sup>1</sup>, Abhijeet S. Sinha<sup>1</sup> and Christer B. Aakeröy<sup>1,\*</sup>

<sup>1</sup> Kansas State University, Department of Chemistry; aakeroy@ksu.edu

\* Correspondence: aakeroy@ksu.edu; Tel.: +1-785 532 6096

**Table S1** Hydrogen Bond Propensity(HBP) calculations using Mercury.

| Target   | DH...A   | HBP  |
|----------|----------|------|
| T1-S-Br  | N1H...N2 | 0.93 |
|          | N1H...N3 | 0.91 |
|          | N1H...Br | 0.10 |
|          | N1H...S1 | 0.03 |
| T1-Se-Br | N1H...N2 | 0.85 |
|          | N1H...N3 | 0.82 |
|          | N1H...Br | 0.08 |
| T1-S-I   | N1H...N2 | 0.95 |
|          | N1H...N3 | 0.93 |
|          | N1H...I  | 0.20 |
|          | N1H...S  | 0.03 |
| T1-Se-I  | N1H...N2 | 0.93 |
|          | N1H...N3 | 0.91 |
|          | N1H...I  | 0.20 |

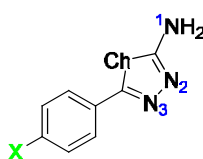

**Scheme S1.** Schematic of 1,3,4-Chalcogendiazole and the numbering used in HBP calculations.

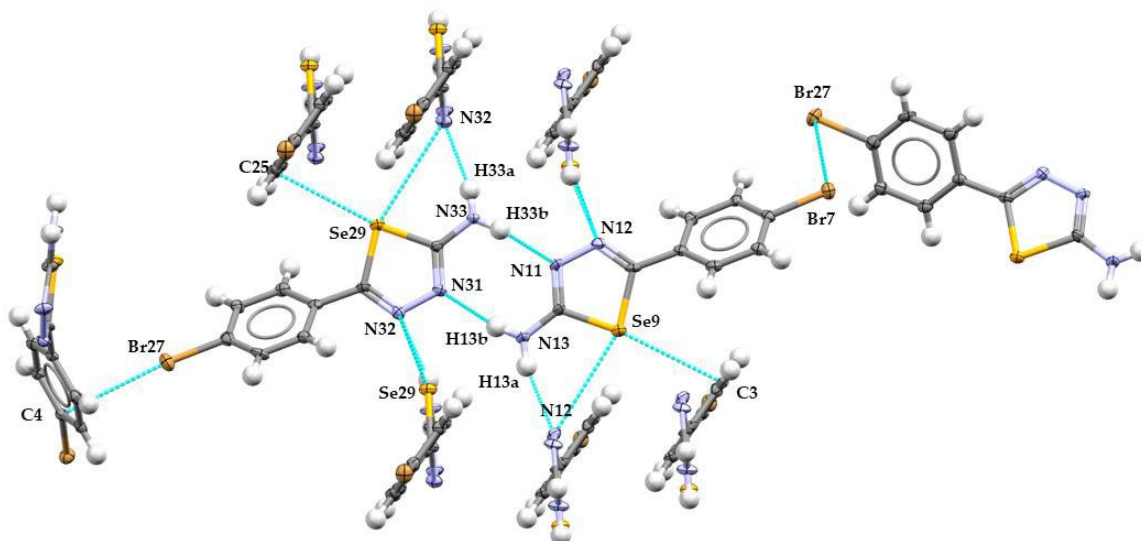

Figure S1 T1-Se-Br Secondary interactions of the second unique molecule of the asymmetric unit.

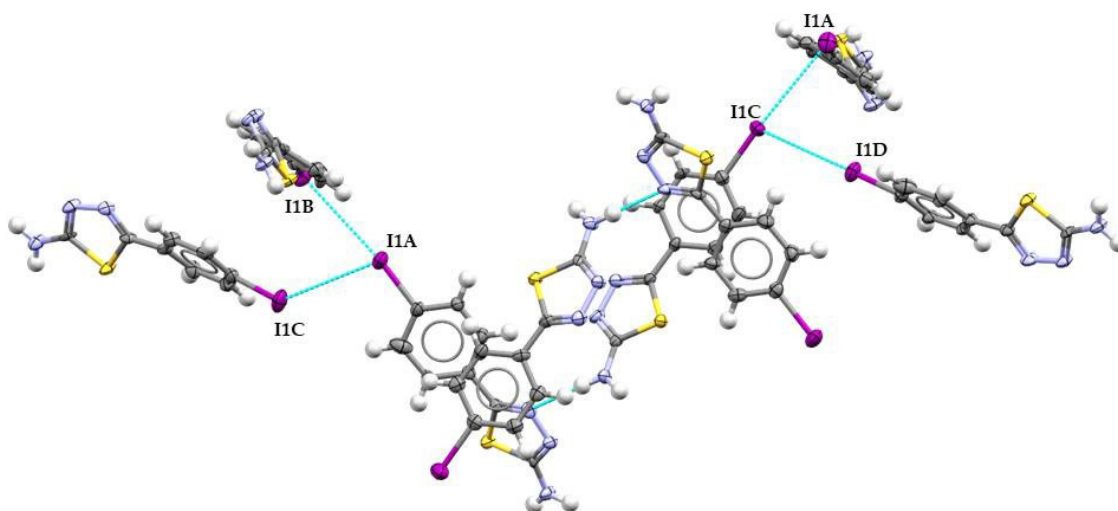

Figure S2. T1-S-I Form I Halogen bonding interactions formed by two unique molecules in the asymmetric unit showing different bond geometries.

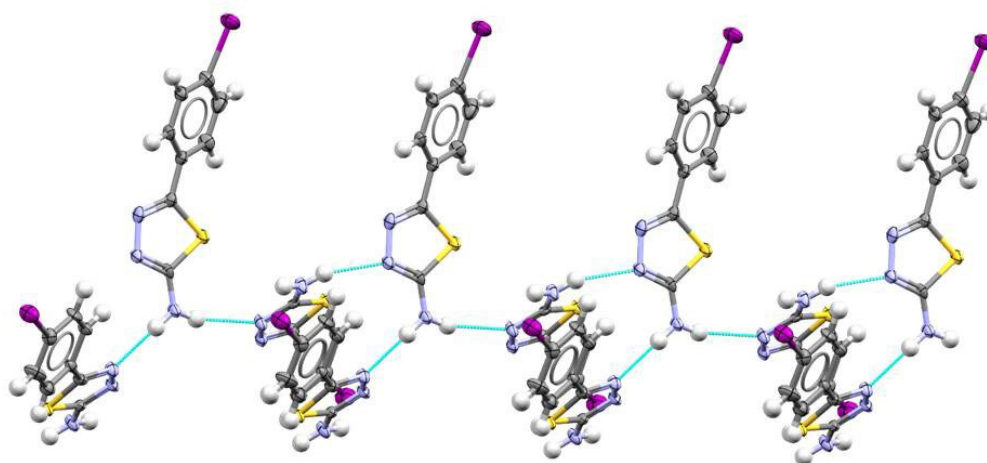

Figure S3. T1-S-I Form I Hydrogen bond 2D chain.

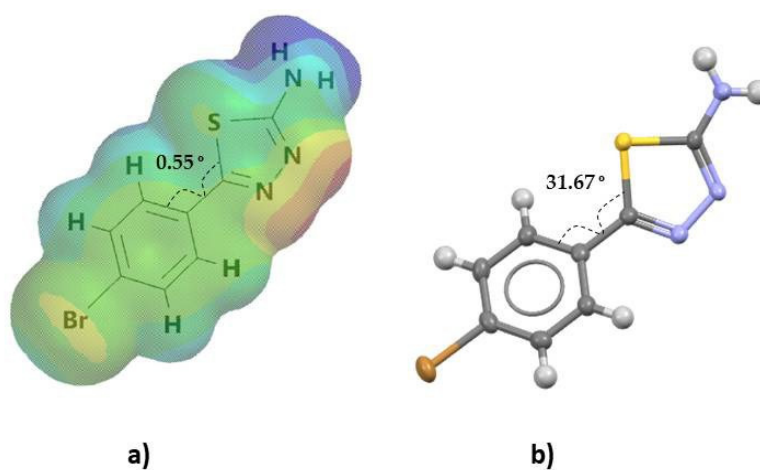

Figure S4. T1-S-Br a) torsion angle of the optimized structure under vacuum b) torsion angle of the crystal structure, refcode XUVTAK.

Table S2. Crystallographic data

| Code              | T1-Se-Br                                                     | T1-S-I Form I                             | T1-S-I Form II                                       | T1-Se-I                                    |
|-------------------|--------------------------------------------------------------|-------------------------------------------|------------------------------------------------------|--------------------------------------------|
| Formula moiety    | $2(\text{C}_8 \text{H}_6 \text{Br} \text{N}_3 \text{Se})$    | $\text{C}_8\text{H}_6\text{IN}_3\text{S}$ | $\text{C}_8 \text{H}_6 \text{I} \text{N}_3 \text{S}$ | $\text{C}_8\text{H}_6\text{IN}_3\text{Se}$ |
| Empirical formula | $\text{C}_{16}\text{H}_{12}\text{Br}_2\text{N}_6\text{Se}_2$ | $\text{C}_8\text{H}_6\text{IN}_3\text{S}$ | $\text{C}_8 \text{H}_6 \text{I} \text{N}_3 \text{S}$ | $\text{C}_8\text{H}_6\text{IN}_3\text{Se}$ |
| Molecular weight  | 606.040                                                      | 303.12                                    | 303.12                                               | 350.02                                     |
| Color, Habit      | Yellow, Needle                                               | Colorless, Plate                          | Colorless, Rectangular                               | Colorless, Rectangular                     |
| Crystal system    | orthorhombic                                                 | monoclinic                                | monoclinic                                           | monoclinic                                 |

|                                  |                    |                   |                    |                    |
|----------------------------------|--------------------|-------------------|--------------------|--------------------|
| Space group, Z                   | Pca2 <sub>1</sub>  | C1c1              | P 1 21/c 1         | P2 <sub>1</sub> /c |
| <i>a</i> , Å                     | 10.9000(2)         | 12.00353(18)      | 12.7804(6)         | 15.5622(3)         |
| <i>b</i> , Å                     | 5.8066(1)          | 11.89672(19)      | 7.3454(4)          | 5.96390(10)        |
| <i>c</i> , Å                     | 29.4257(4)         | 27.1321(4)        | 11.2053(5)         | 10.9214(2)         |
| $\alpha$ , °                     | 90                 | 90                | 90                 | 90                 |
| $\beta$ , °                      | 90                 | 95.8033(14)       | 109.268(2)         | 98.3760(10)        |
| $\gamma$ , °                     | 90                 | 90                | 90                 | 90                 |
| Volume, Å <sup>3</sup>           | 1862.41(5)         | 3854.68(11)       | 993.00(8)          | 1002.82(3)         |
| Density, g/cm <sup>3</sup>       | 2.161              | 2.089             | 2.028              | 2.318              |
| <i>T</i> , °K                    | 100.00(10)         | 200.00(10)        | 199.99             | 199.99             |
| Crystal size, min x<br>mid x max | 0.10 × 0.04 × 0.02 | 0.16 × 0.1 × 0.03 | 0.17 × 0.06 × 0.04 | 0.05 × 0.03 × 0.02 |
| X-ray wavelength,<br>Å           | 1.54184            | 0.71073           | 1.54178            | 1.54178            |
| $\mu$ , mm <sup>−1</sup>         | 10.112             | 3.494             | 26.954             | 28.895             |
| Trans min / max                  | 0.06603, 1.00000   | 0.49396, 1.00000  | 0.3420, 0.7531     | 0.326, 0.596       |
| $\theta_{min}$ , °               | 3.00               | 2.417             | 3.664              | 2.870              |
| $\theta_{max}$ , °               | 77.39              | 27.999            | 68.442             | 70.232             |
| Reflections                      |                    |                   |                    |                    |
| collected                        | 15890              | 25434             | 5638               | 7588               |
| independent                      | 3626               | 8170              | 1756               | 1846               |
| observed                         | 3517               | 7479              | 1571               | 1771               |
| R <sub>int</sub>                 | 0.0559             | 0.0215            | 0.0528             | 0.0339             |
| Threshold expres-<br>sion        | > 2 $\sigma(I)$    | > 2 $\sigma(I)$   | > 2 $\sigma(I)$    | > 2 $\sigma(I)$    |
| No. parameters                   | 236                | 470               | 126                | 119                |
| No. restraints                   | 1                  | 8                 | 0                  | 0                  |

|                                                |                 |               |               |               |
|------------------------------------------------|-----------------|---------------|---------------|---------------|
| R <sub>1</sub> (observed)                      | 0.0373          | 0.0436        | 0.0435        | 0.0284        |
| wR <sub>2</sub> (all)                          | 0.1016          | 0.1108        | 0.128         | 0.0722        |
| Goodness of fit (all)                          | 1.0357          | 1.148         | 1.093         | 1.077         |
| $\rho_{\max}, \rho_{\min}, e \text{ \AA}^{-3}$ | 0.9954, -0.8715 | 2.589, -0.857 | 0.808, -1.157 | 1.405, -0.700 |
| Completeness to 2 $\theta$ limit               | 0.9703          | 0.985         | 0.959         | 0.967         |

## References

1. Wood, P.A.; Feeder, N.; Furlow, M.; Galek, P.T.A.; Groom, C.R.; Pidcock, E. Knowledge-based approaches to co-crystal design. *CrystEngComm* **2014**, *16*, 5839–5848, doi:10.1039/c4ce00316k.
